# Supplementary material for: Red emissive carbon dots obtained from direct calcination of 1,2,4-triaminobenzene for dual-mode pH sensing in living cells
Source: Royal Society of Chemistry journal article supplement (doi:10.1039/d0nj00985g), 2020-01-01
Supplement: d0nj00985g1.pdf [file d0nj00985g1.pdf]

## **Supplementary Information**

### **Red emissive carbon dots obtained from direct calcination of 1,2,4-triaminobenzene for dual-mode pH sensing in living cells**

Yueyue Chen, Chan Wang\*, Yalan Xu, Guoxia Ran, Qijun Song\*

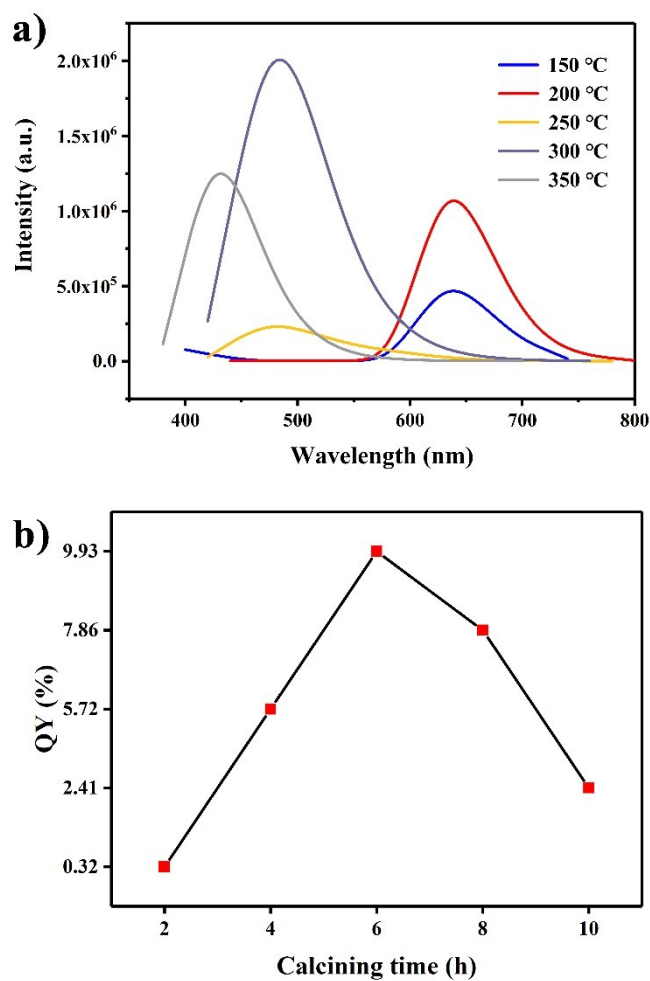

**Figure S1.** a) Fluorescence emission spectra of r-CDs at different calcining temperature. b) Quantum yields of r-CDs under different calcining time.

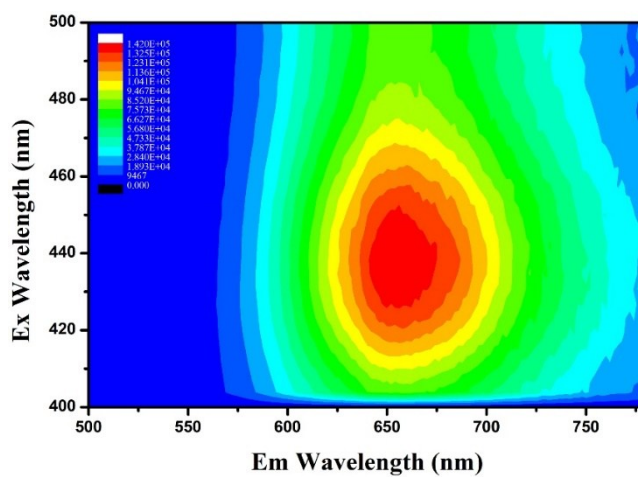

**Figure S2.** Fluorescence matrix scan of r-CDs during the calcination treatment for 6 h at the temperature of 200 °C.

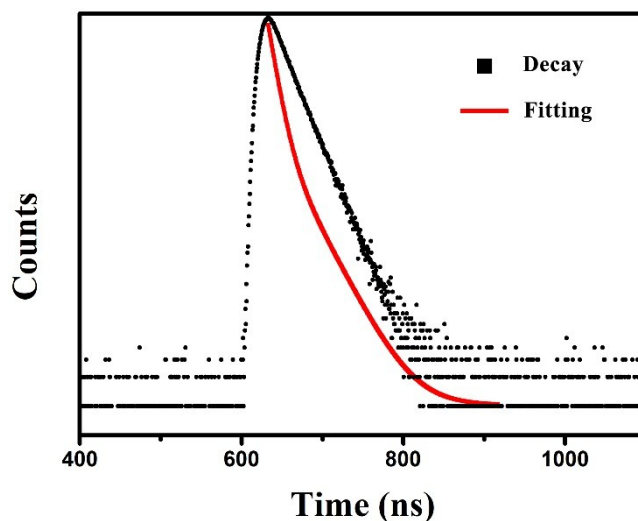

**Figure S3.** Fluorescence decay curve (black) and its fitting curve (red) of r-CDs during the calcination treatment for 6 h at the temperature of 200 °C.

**Table S1.** Fluorescence lifetime of r-CDs during the calcination treatment for 6 h at the temperature of 200 °C.

| Sample | B <sub>1</sub> [%] | $\tau_1$ [ns] | B <sub>2</sub> [%] | $\tau_2$ [ns] | $\tau_{avg}$ [ns] |
|--------|--------------------|---------------|--------------------|---------------|-------------------|
| r-CDs  | 91                 | 0.84          | 9                  | 2.73          | 1.00              |

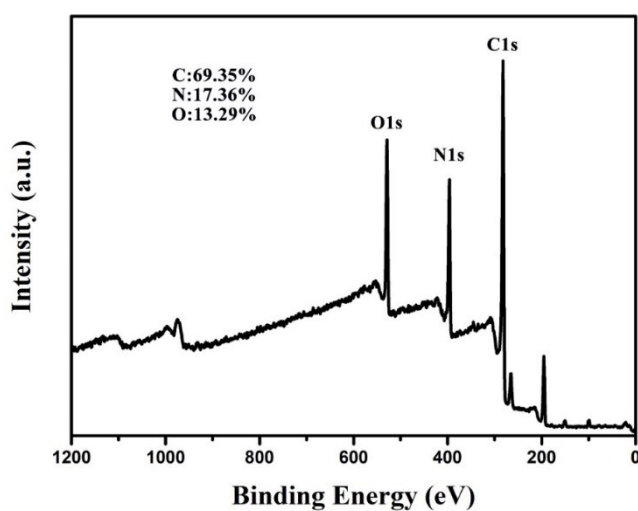

**Figure S4.** Survey of XPS spectra of r-CDs during the calcination treatment for 6 h at the temperature of 200 °C.

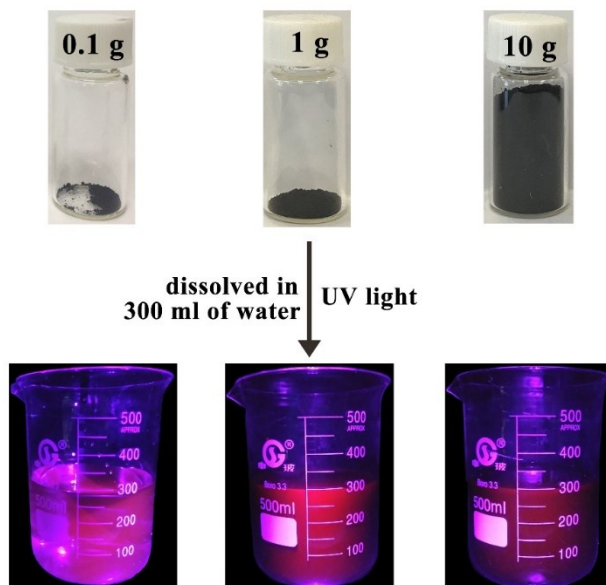

**Figure S5.** Schematic illustration of large-scale preparation of solid-state r-CDs.

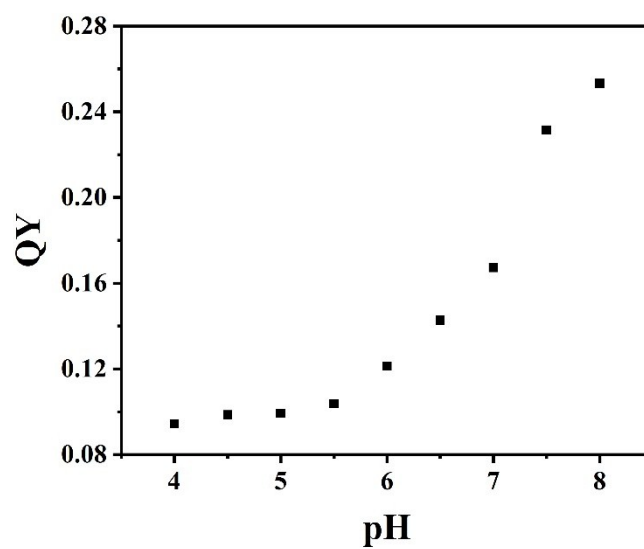

**Figure S6.** The QYs of CDs at different pH values.

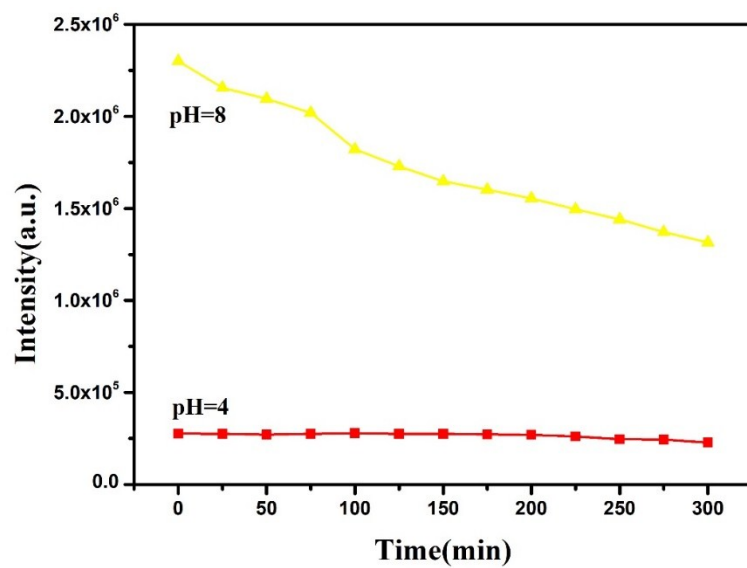

**Figure S7.** Photostability of r-CDs at different pH values over 5 h of UV irradiation.

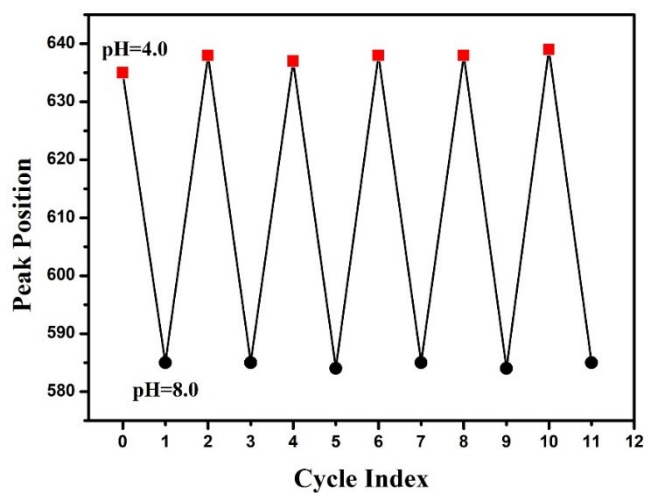

**Figure S8.** Fluorescence reversibility of r-CDs at different pH values.

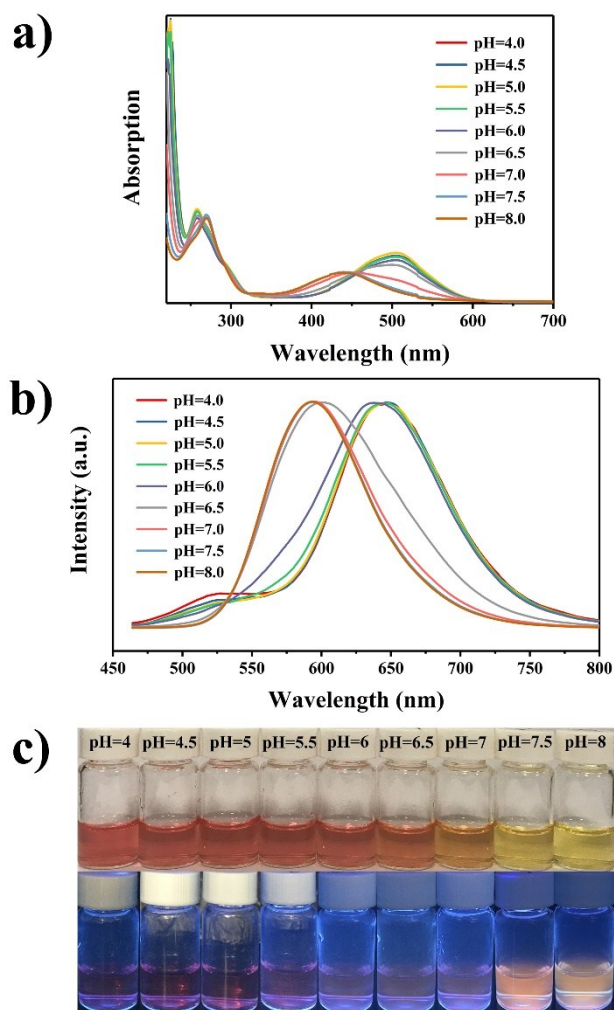

**Figure S9.** The colorimetric and fluorometric pH response of CDs-1 from 1,2,4-triaminobenzene by the hydrothermal method. a) UV-vis absorption spectrum and b) PL spectra of CDs-1 at different pH values under excitation of 444 nm, c) photos of CDs-1 at different pH values in daylight (upper) and UV light (bottom).

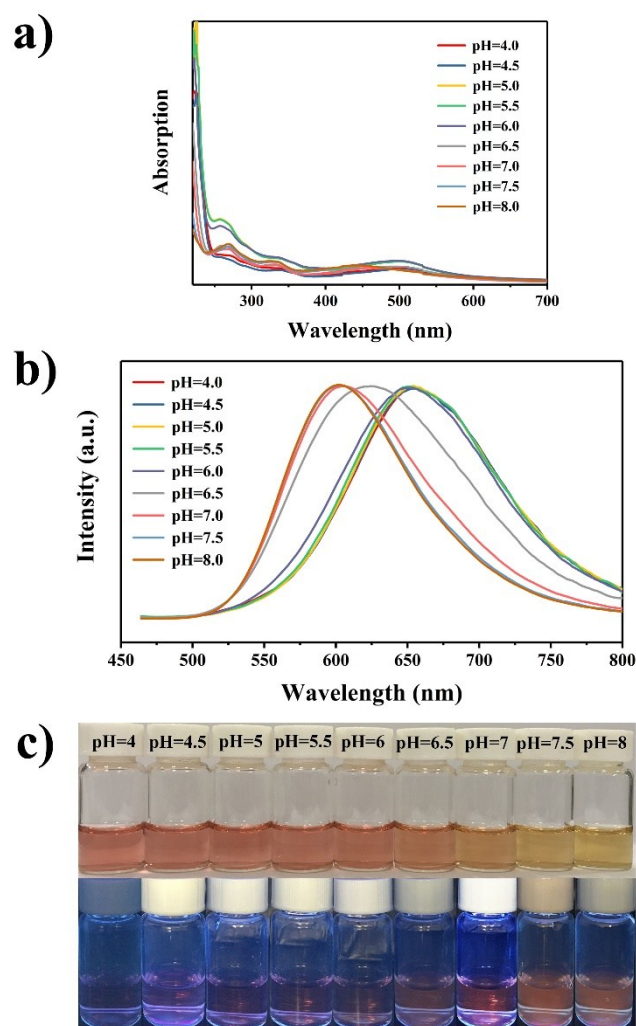

**Figure S10.** The colorimetric and fluorometric pH response of CDs-2 from 1,2,4-triaminobenzene by the microwave method. a) UV-vis absorption spectrum and b) PL spectra of CDs-2 at different pH values under excitation of 444 nm, c) photos of CDs-2 at different pH values in daylight (upper) and UV light (bottom).

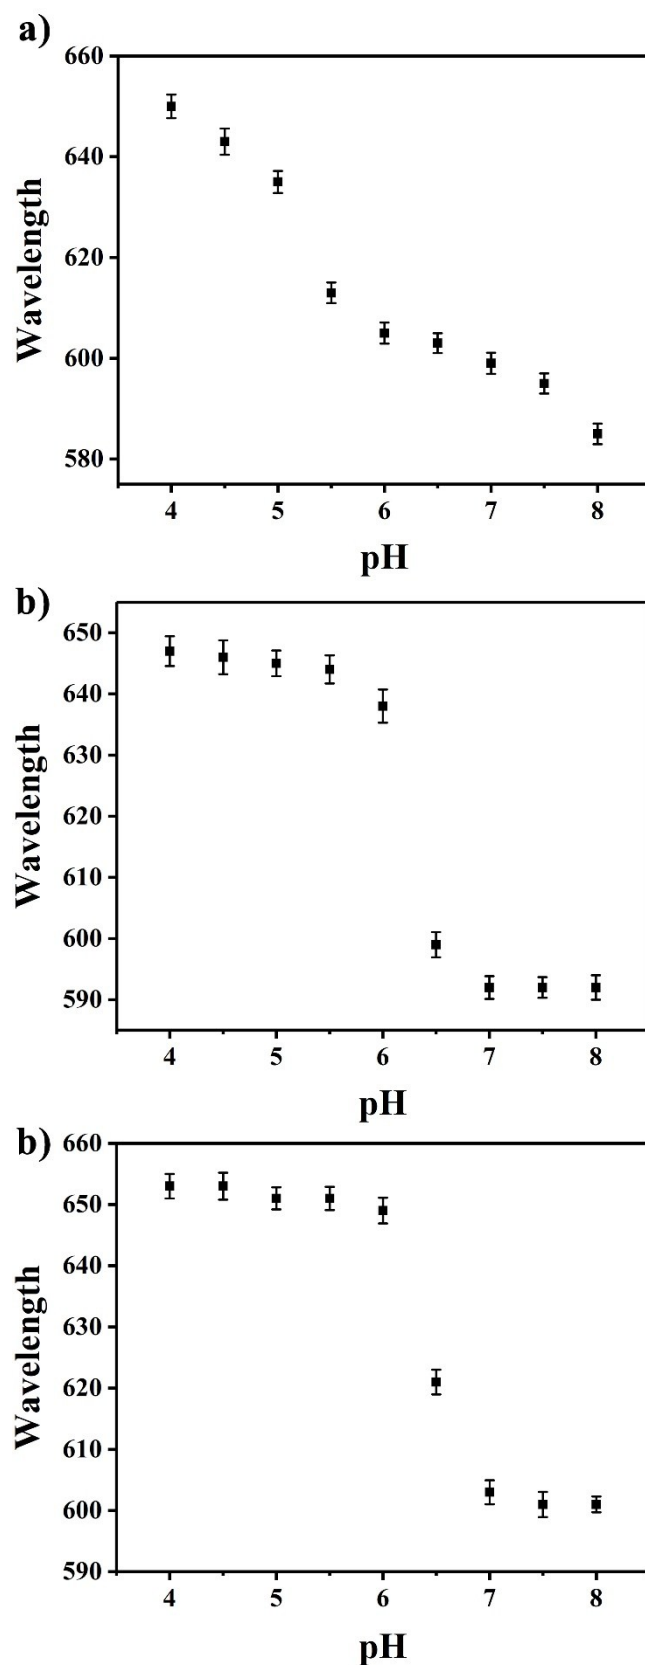

**Figure S11.** The emission wavelength changes of three kinds of CDs with pH respectively by a) solid-phase synthesis, b) hydrothermal method and c) microwave method.



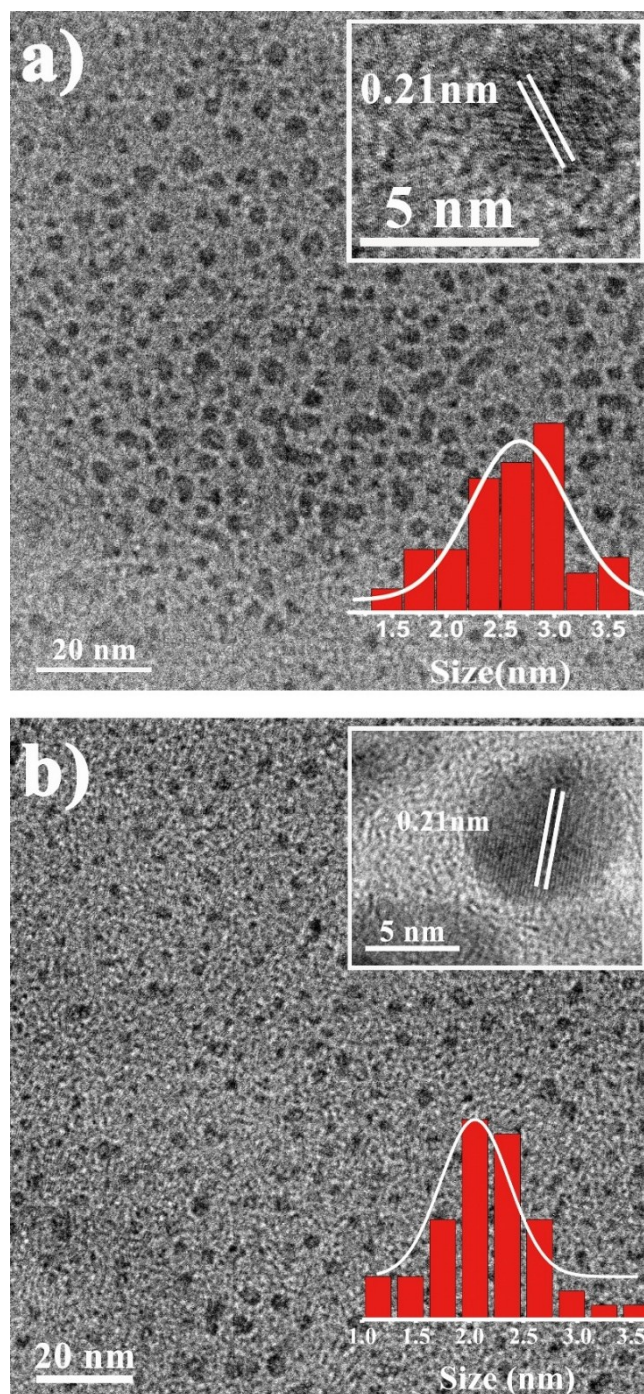

**Figure S12.** TEM images of r-CDs at a) pH=4.0 and b) pH=8.0. Inserts: HRTEM images (top) and size distribution histograms (bottom) of the r-CDs at pH=4.0 and pH=8.0, respectively.

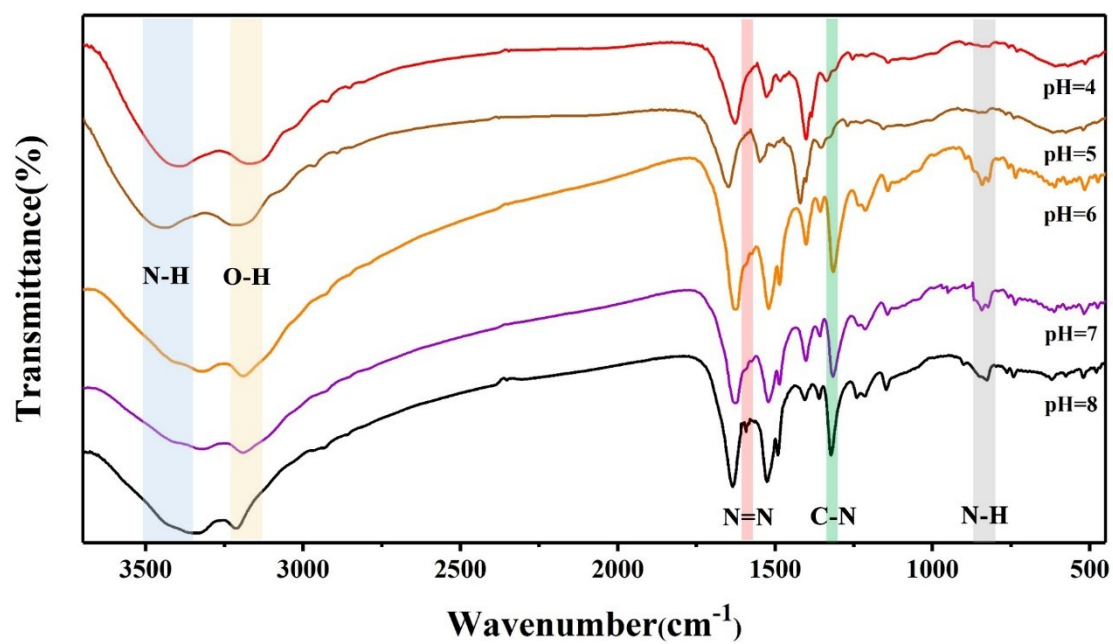

**Figure S13.** The FT-IR spectrum of r-CDs at different pH values.

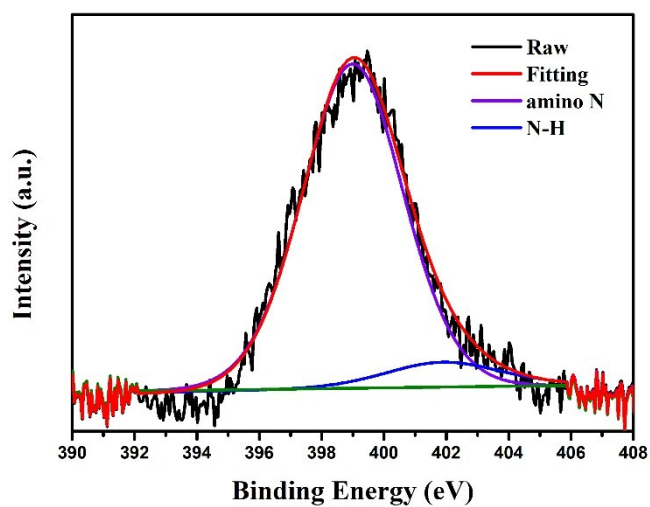

**Figure S14.** The high-resolution XPS spectrum of N 1s of r-CDs at pH 8.0.

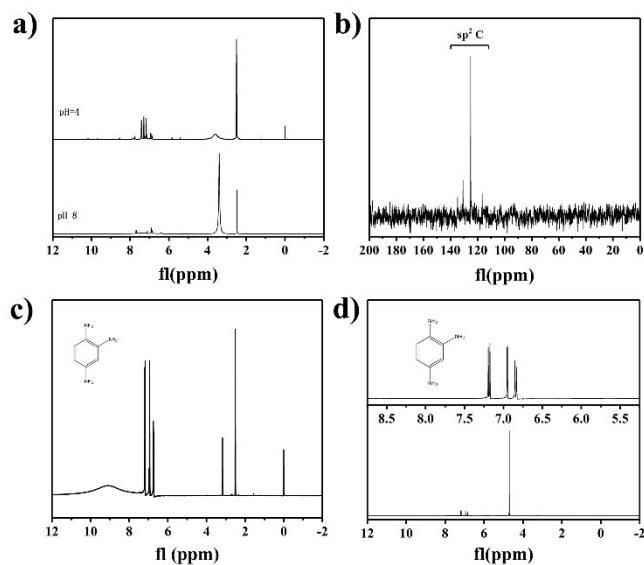

**Figure S15.** (a) <sup>1</sup>H NMR spectrum of r-CDs in DMSO-d<sub>6</sub> (10 mg/mL); (b) <sup>13</sup>C NMR spectrum of r-CDs in D<sub>2</sub>O (40 mg/mL); (c) and (d) <sup>1</sup>H NMR spectrum of 1,2,4-triaminobenzene in DMSO-d<sub>6</sub> and D<sub>2</sub>O (10 mg/mL).

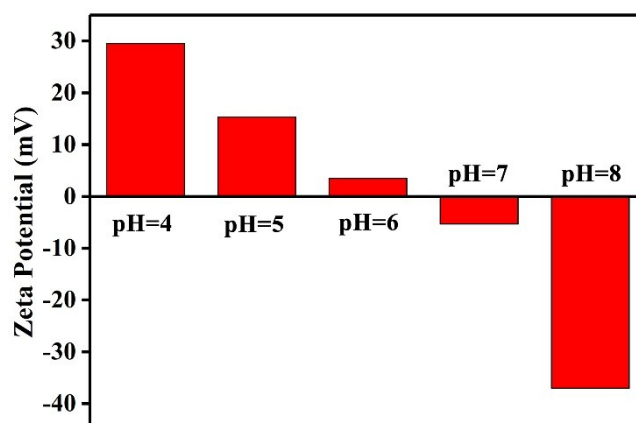

**Figure S16.** Zeta potentials of r-CDs at different pH values.

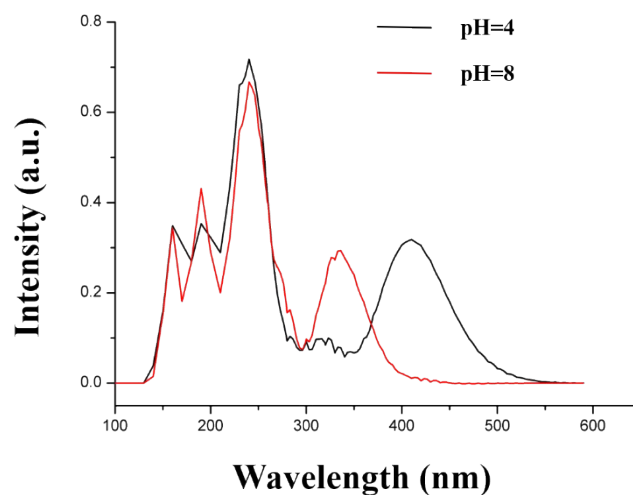

**Figure S17.** Simulated absorption spectra at optimized  $S_0$  geometry of r-CDs at different pH.

**Table S2.** Calculated lowest-lying singlet absorption ( $\lambda$ , nm), oscillator strength ( $f$ ), and transition property of r-CDs at different pH.

|      | $\lambda$ (nm) | $f$    | transition              | contribution (%) |
|------|----------------|--------|-------------------------|------------------|
| pH=4 | 410            | 0.5301 | HOMO $\rightarrow$ LUMO | 97               |
| pH=8 | 337            | 0.5119 | HOMO $\rightarrow$ LUMO | 95               |

The molecular structures of ground state were optimized at the density functional theory (DFT) using the M06-2X method. [1,2] In all calculations, the triple- $\zeta$  basis sets augmented with polarization functions (def2-TZVP) was employed in Gaussian 09 program. [3,4]

- [1] R.G. Parr, Density functional theory of atoms and molecules, Horizons of Quantum Chemistry, (1980) 5-15.
- [2] Y. Zhao, D.G. Truhlar, The M06 suite of density functionals for main group thermochemistry, thermochemical kinetics, noncovalent interactions, excited states, and transition elements: two new functionals and systematic testing of four M06-class functionals and 12 other functionals, Theoretical Chemistry Accounts 120(1-3) (2008) 215-241.
- [3] F. Weigend, R. Ahlrichs, Balanced basis sets of split valence, triple zeta valence and quadruple zeta valence quality for H to Rn: Design and assessment of accuracy, Phys. Chem. Chem. Phys. 7(18) (2005) 3297-3305.
- [4] M.J. Frisch, G. Trucks, H. Schlegel, G. Scuseria, M. Robb, J. Cheeseman, G. Scalmani, V. Barone, B. Mennucci, G. Petersson, Gaussian 09, Revision D. 01, Gaussian, Inc.: Wallingford, CT (2009)

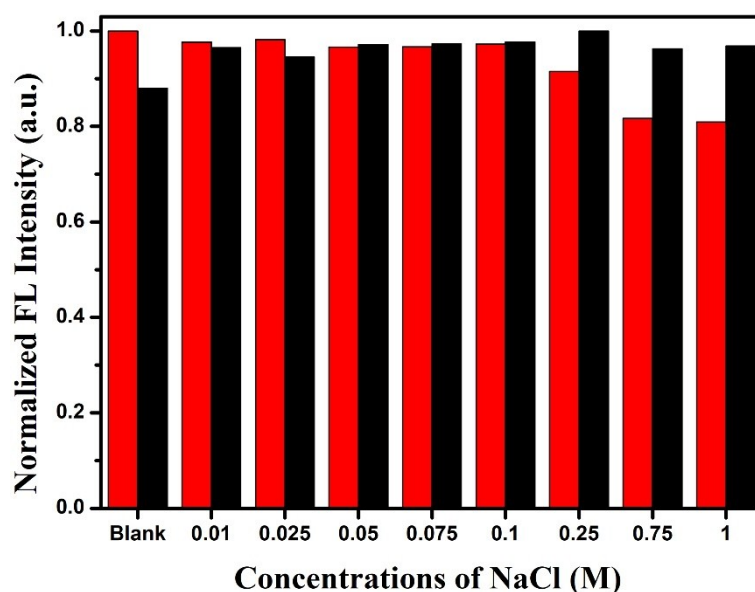

**Figure S18.** FL intensity variation of the r-CDs as concentrations of NaCl (red bar)

represents pH=4 and black bar represents pH=8).

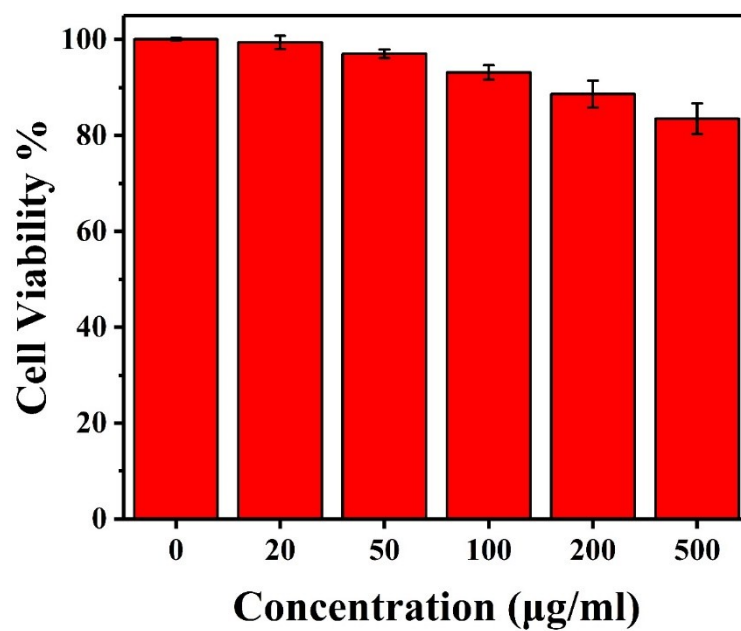

**Figure S19.** Cell viability of HeLa cells with different concentrations of r-CDs.
